# Supplementary material for: NLRP3 Regulates Mandibular Healing through Interaction with UCHL5 in MSCs
Source: PubMed Central journal article supplement (PMC9910010; doi:10.7150/ijbs.78174), 2023-01-16
Supplement: ijbsv19p0936s1.pdf [file ijbsv19p0936s1.pdf]

## Supplemental figure 1

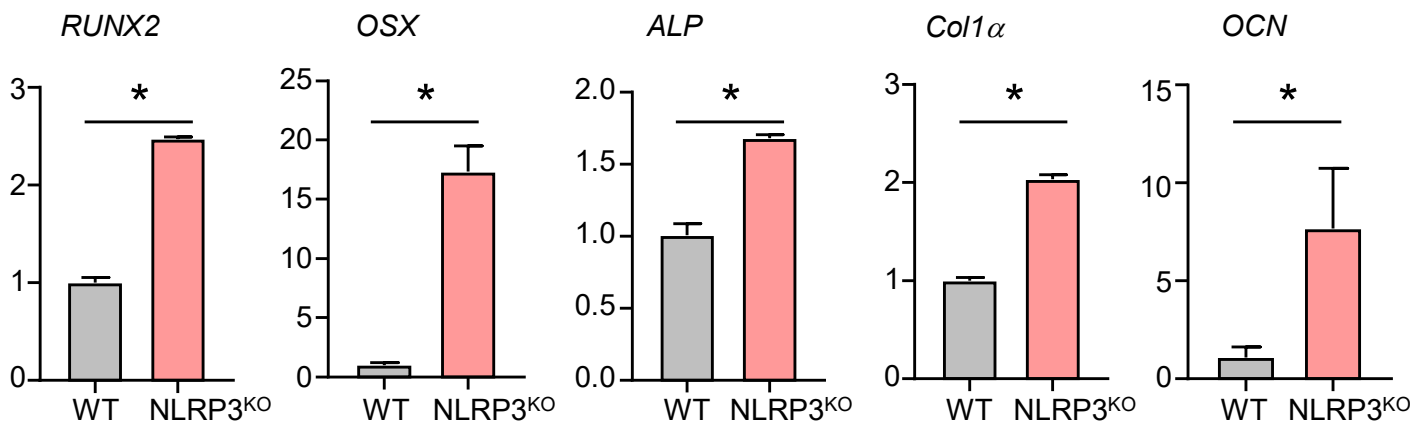

### Figure S1. NLRP3 deficiency increases the expression levels of osteoblast-related genes

Mandibular bone marrow cells from 2-month-old NLRP3<sup>KO</sup> mice and their WT littermates were cultured in osteoblast induction medium for 7 days. The relative gene expression levels of *RUNX2*, *OSX*, *ALP*, *Col1α*, and *OCN* were determined by qPCR. Values are mean  $\pm$  SEM. Two-tailed unpaired Student's t-test was performed. \* $P < 0.05$  in the indicated groups.

## Supplemental figure 2

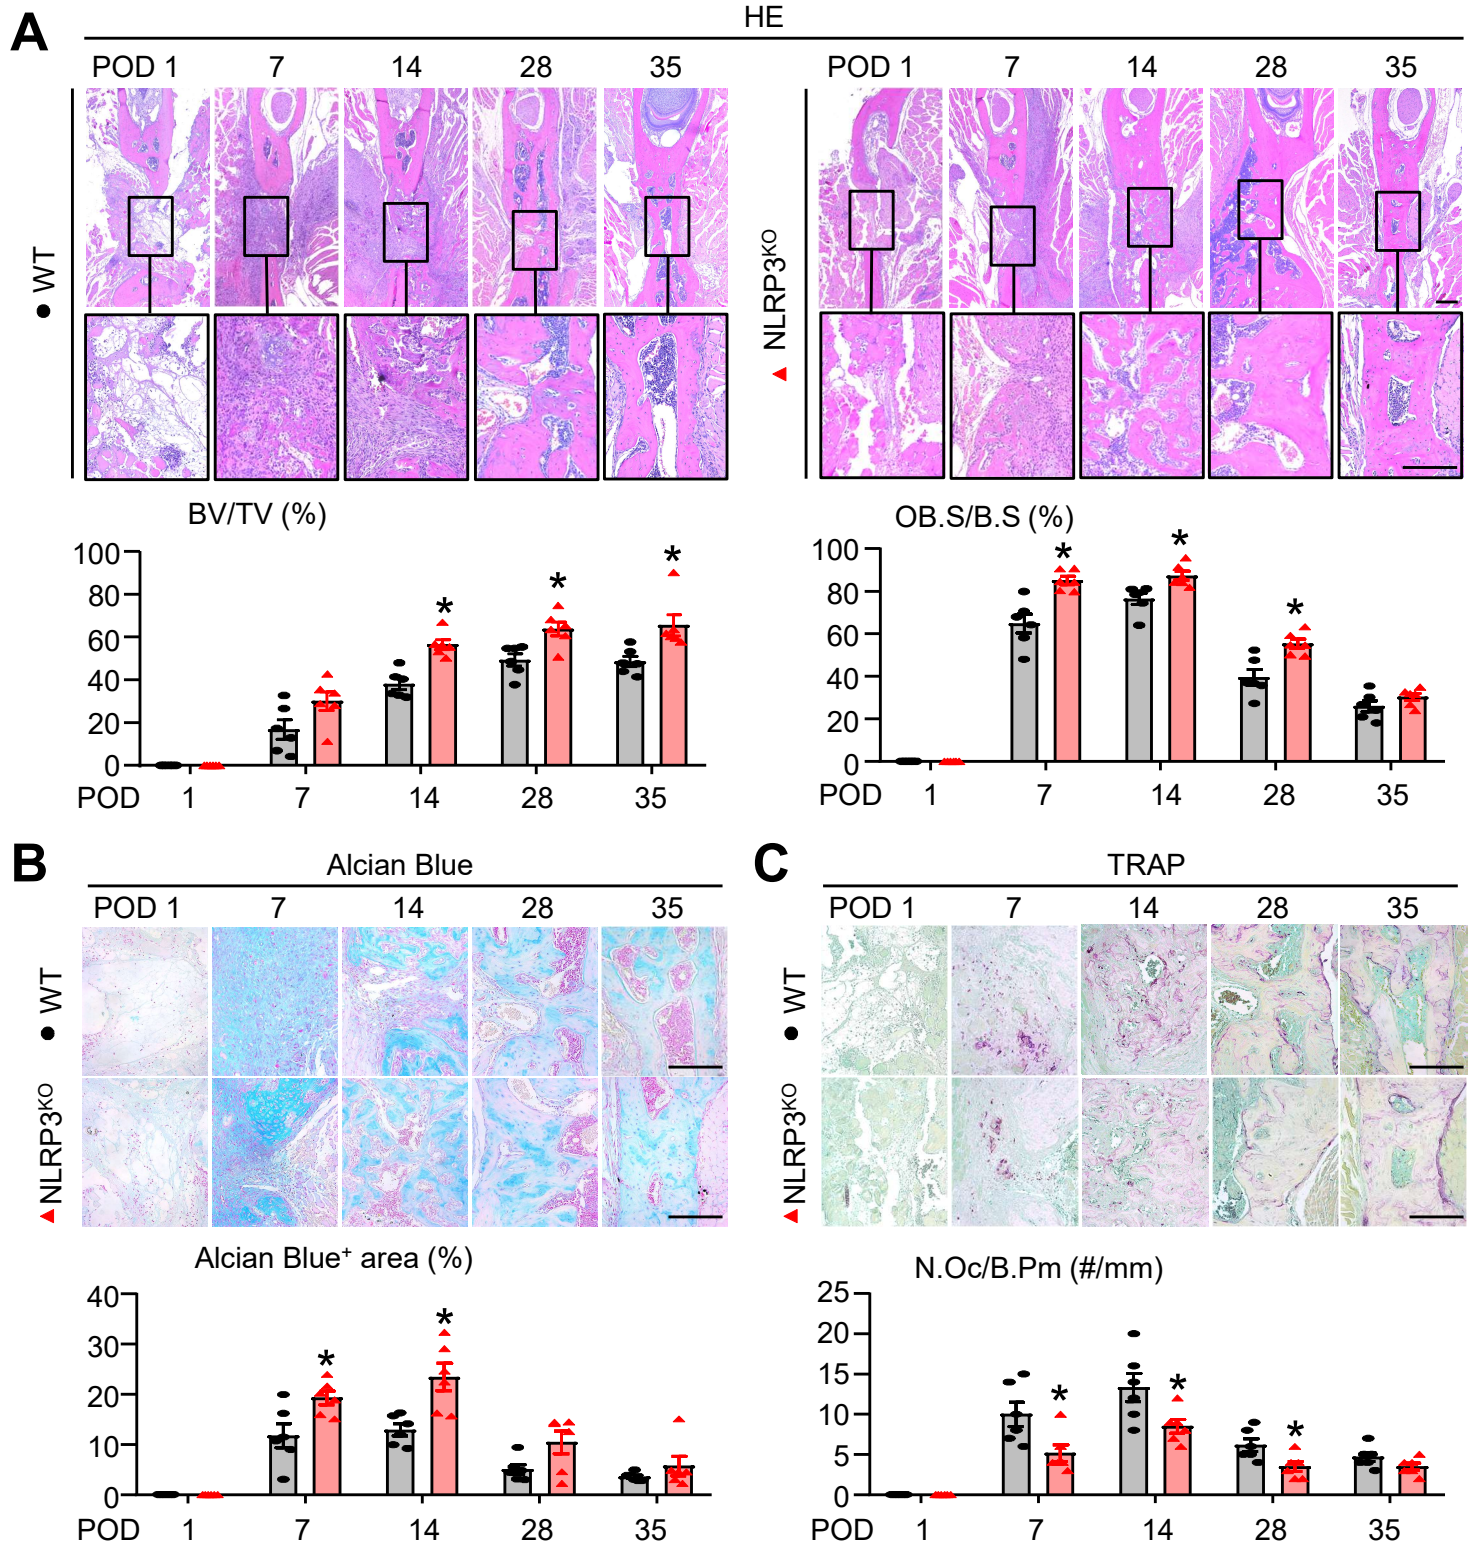

### Figure S2. NLRP3 deficiency promotes mandibular healing

Two-month-old WT and NLRP3<sup>KO</sup> mice received mandibular osteotomy surgery and were sacrificed at various time points during healing, N=6. (A) Representative images of H&E-stained paraffin sections. BV/TV (%) and surface of ALP-positive osteoblasts relative to bone surface (OB.S/B.S) were determined. (B) Representative images of AB-stained paraffin sections. AB-positive area were determined. (C) Representative images of TRAP-stained paraffin sections. Number of TRAP-positive osteoclasts relative to bone surface (#/mm) were determined. Scale bars, 200  $\mu$ m. Values are mean  $\pm$  SEM. Two-tailed unpaired Student's t-test was performed. \* $P < 0.05$  vs. WT at the same time point.

## Supplemental figure 3

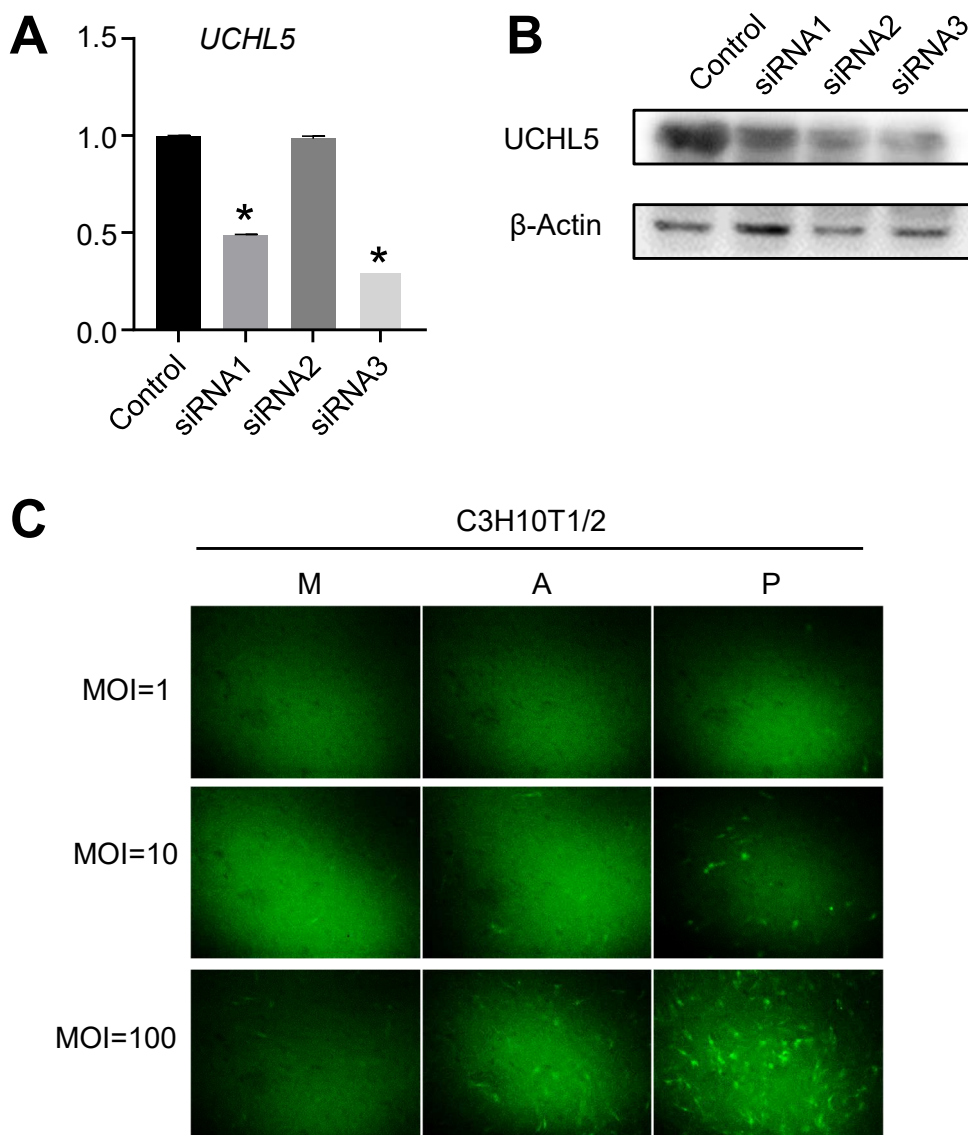

**Figure S3. Efficiency testing with different transfection reagents**

(A-B) C3H10T1/2 cell lines were cultured and transfected with small interfering negative control RNA (si-NC) or specific UCHL5 small interfering RNA (si-UCHL5), respectively. Transfection efficiency was measured 48 h post-transfection using qPCR (A) and Western blot (B). (C) Lentiviral infection efficiency in cells was determined with the lentiviruses expressing GFP (green-fluorescent protein) 24 h after infection. HitransG A or HitransG P was added to promote the efficient lentivirus infection of cells.

## Supplemental figure 4

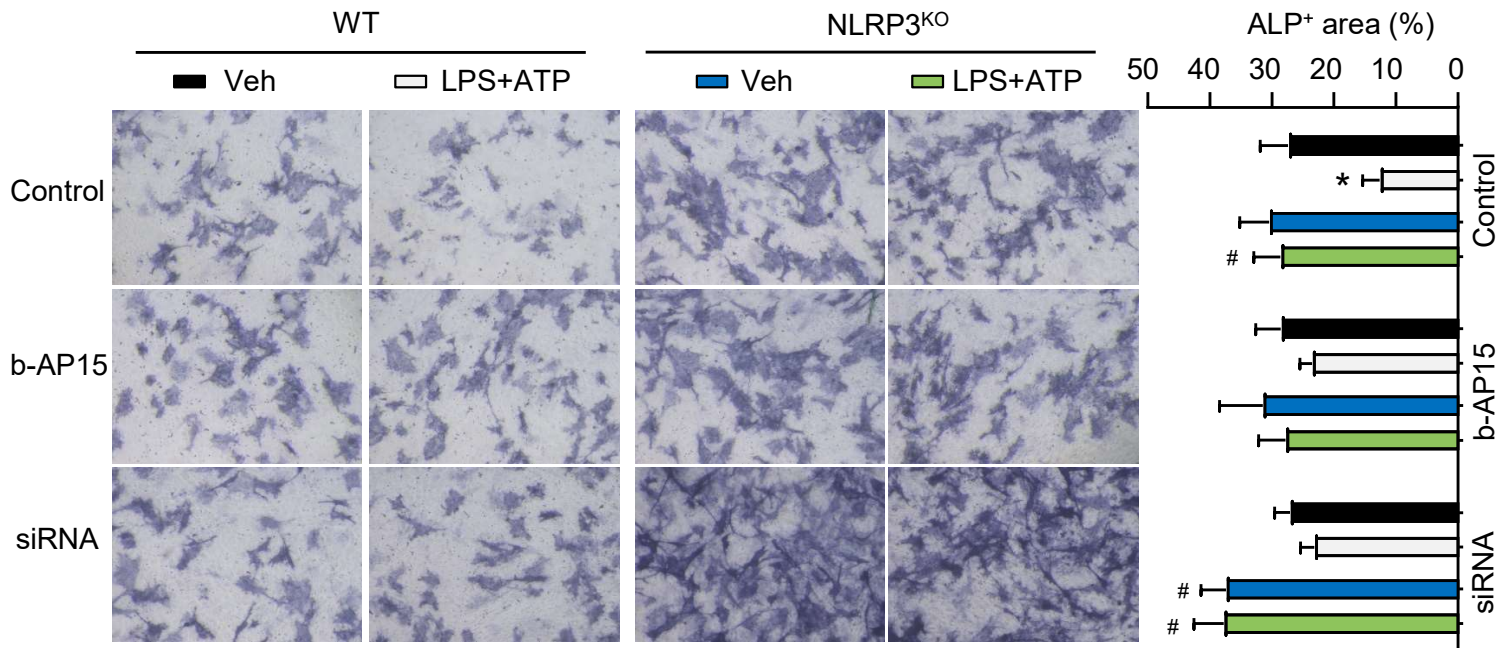

**Figure S4. UCHL5 inhibition enhances OB differentiation**

M-MSCs from NLRP3<sup>KO</sup> mice and their WT littermates were treated with b-AP15, or transfected with si-UCHL5. Cells were stimulated with or without 10 $\mu$ g/ml LPS  $\pm$  5mM ATP and subjected to ALP staining. ALP<sup>+</sup> areas were measured. All error bars represent SEM. One-way ANOVA followed by Dunnett's post-hoc multiple comparisons was performed. \* $P < 0.05$  vs. control or WT without treatment, # $P < 0.05$  vs WT treated with the same reagent.

# Supplemental table 1

The sequences of primers used.

| Genes                         | Sequences                                               |
|-------------------------------|---------------------------------------------------------|
| <i>GAPDH</i>                  | F: GGTCGGTGTGAACGGATTTG<br>R: ATGAGCCCTTCCACAATG        |
| <i>NLRP3</i>                  | F: ATTACCCGCCCCGAGAAAGG<br>R: TCGCAGCAAAGATCCACACAG     |
| <i>IL-1<math>\beta</math></i> | F: AACCTGCTGGTGTGTGACGTTC<br>R: CAGCACGAGGCTTTTTTGTGT   |
| <i>Caspase-1</i>              | F: ACAAGGCACGGGACCTATG<br>R: TCCCAGTCAGTCCTGGAAATG      |
| <i>OCN</i>                    | F: CTGACCTCACAGATGCCAAG<br>R: GTAGCGCCGGAGTCTGTTC       |
| <i>ALP</i>                    | F: CTTGCTGGTGGGAAGGAGGCAGG<br>R: CACGTCTTCTCCACCGTGGGTC |
| <i>Colla</i>                  | F: GCTCCTCTTAGGGGCCACT<br>R: CCACGTCTCACCATTGGGG        |
| <i>RUNX2</i>                  | F: ATGCTTCATTCGCCTCACAAA<br>R: GCACTCACTGACTCGGTTGG     |
| <i>OSX</i>                    | F: ATGGCGTCCTCTCTGCTTG<br>R: TGAAAGGTCAGCGTATGGCTT      |
